# Supplementary material for: One pot microwave-assisted synthesis of Ag decorated yolk@shell structured TiO2 microspheres
Source: Royal Society of Chemistry journal article supplement (doi:10.1039/c4ra14675a), 2015-01-01
Supplement: c4ra14675a1.pdf [file c4ra14675a1.pdf]

## One pot microwave-assisted synthesis of Ag decorated yolk@shell structured TiO<sub>2</sub> microspheres

Yong Yang,<sup>a,b</sup> Guozhong Wang,<sup>\*a</sup> Gang Gu,<sup>b</sup> Qian Li,<sup>c</sup> Shenghong Kang,<sup>a</sup> Yunxia Zhang,<sup>a</sup> Dickon H.L. Ng<sup>c</sup> and Huijun Zhao<sup>a,d</sup>

### Supporting Information:

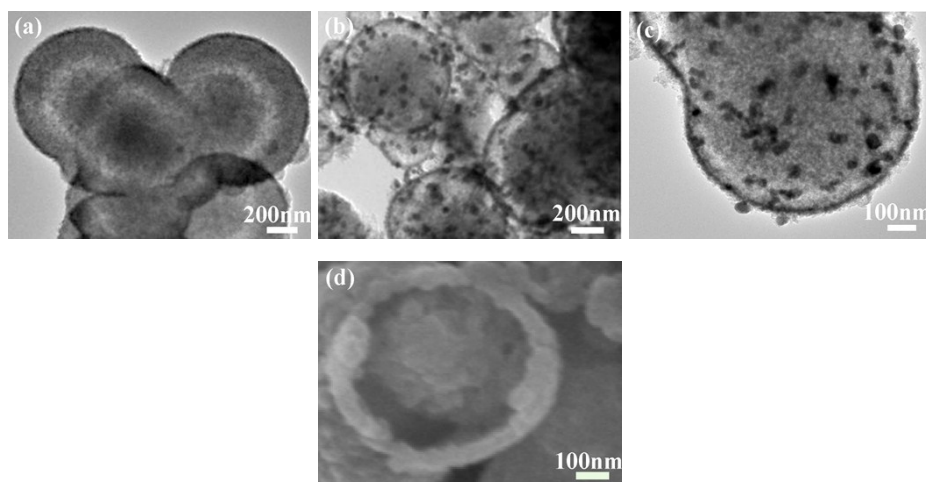

**Figure S1.** TEM images of the different products: (a) Ag-TS0; (b) Ag-TS1; (c) Ag-TS3, (d) SEM image of Ag-TS3.

**Table 1.** Ag content of the different samples

| sample | AgNO <sub>3</sub> (mmol) | Ag (wt %) <sup>a</sup> | Ag (wt %) <sup>b</sup> |
|--------|--------------------------|------------------------|------------------------|
| Ag-TS1 | 0.044                    | 1.42                   | 1.21                   |
| Ag-TS2 | 0.074                    | 3.64                   | 3.26                   |
| Ag-TS3 | 0.222                    | 9.71                   | 7.81                   |

<sup>a</sup> determined by the ICP measurement. <sup>b</sup> determined by the EDX measurement.

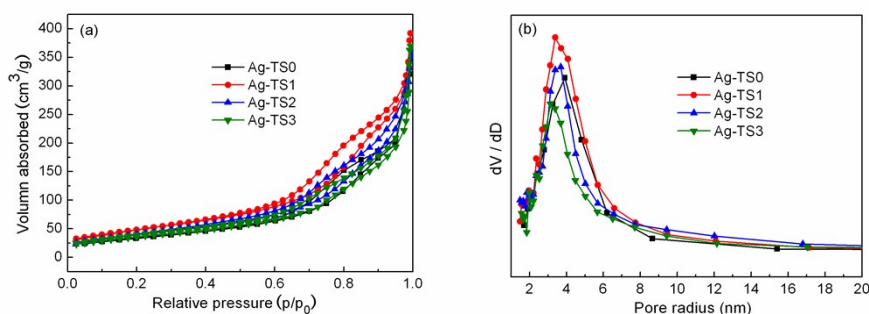

**Figure S2.** (a) Nitrogen sorption isotherms and (b) pore size distribution curves of the different samples.

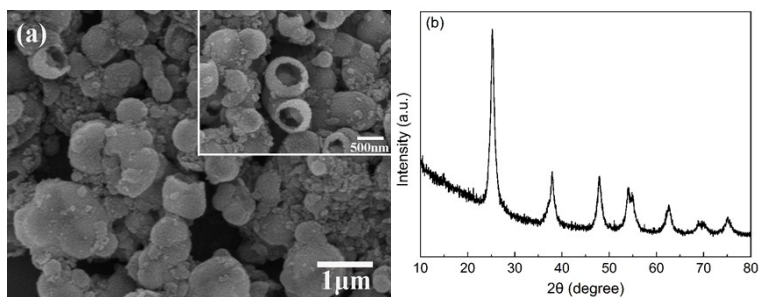

**Figure S3.** (a) FESEM image and (b) XRD pattern of the products prepared without the addition of urea when the other conditions were maintained. Inset in (a) is the corresponding enlarged image.

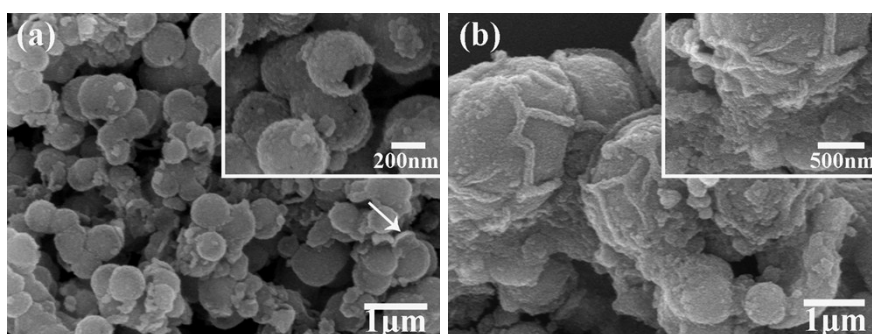

**Figure S4.** (a) FESEM image of the product prepared by microwave treatment at 180 °C for 30 min. (b) FESEM image of the product prepared at 120 °C for 30 min by the conventional heating method using the electric dry oven. Inset in (a) and (b) are the corresponding enlarged images.

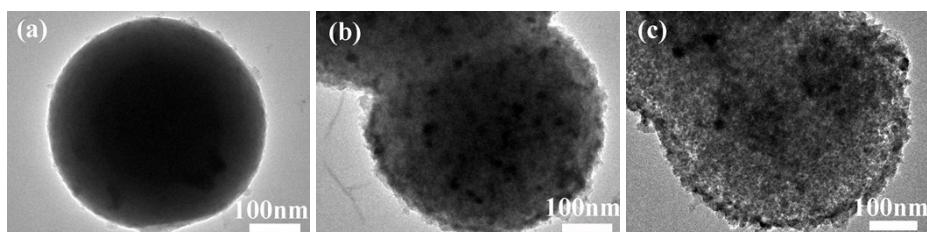

**Figure S5.** TEM images of the as-synthesized products at 120 °C with the different reaction times. (a) 1 min; (b) 5 min; (c) 10 min.

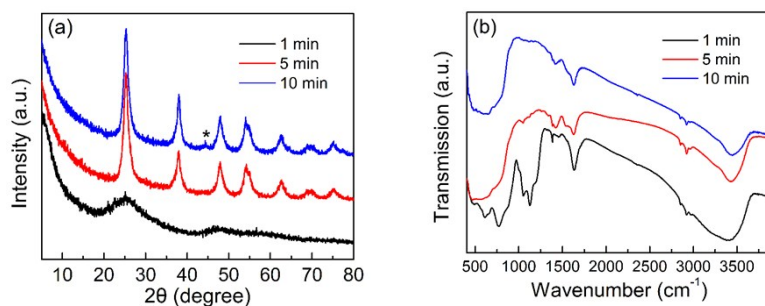

**Figure S6.** (a) XRD patterns and (b) FTIR spectra of the as-synthesized products at 120 °C with the different reaction times.

**Table 2.** Total Cr ions concentration (ppm) measured by ICP, which remained in the photocatalytic reaction solution after 2 h illumination with the different photocatalysts

| photocatalyst         | Ag-TS0 | Ag-TS1 | Ag-TS2 | Ag-TS3 |
|-----------------------|--------|--------|--------|--------|
| Cr ions concentration | 4.1    | 2.2    | 0.07   | 0.05   |

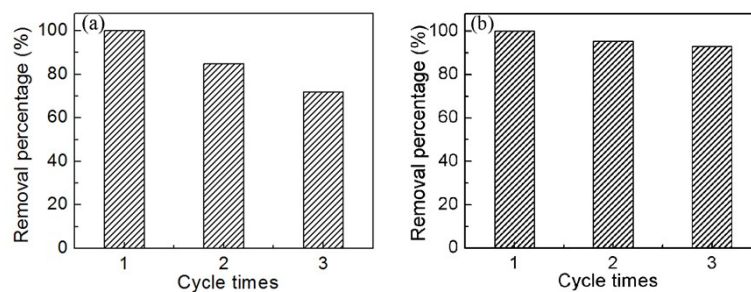

**Figure S7.** Durability of Ag-TS2 under irradiation for the three cycles: (a) Cr(VI); (b) MB.
